# Supplementary material
Source: Springer Nature journal article supplement (https://www.springermedizin.de/resource/supplementary/13041_2012_194_MOESM7_ESM.pdf/25657704)

### Light/Dark Transition Test

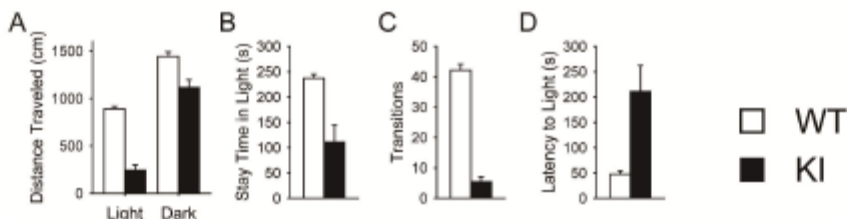

### Open Field Test

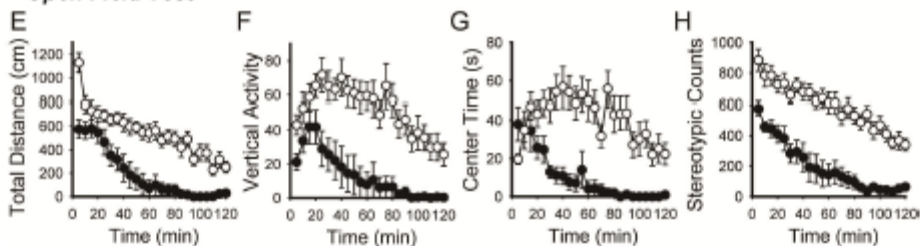

### Elevated Plus Maze

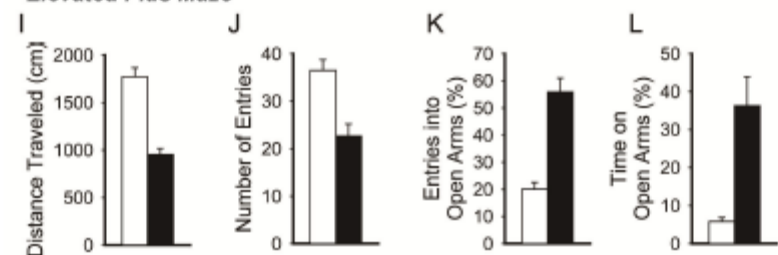

### Social Interaction Test

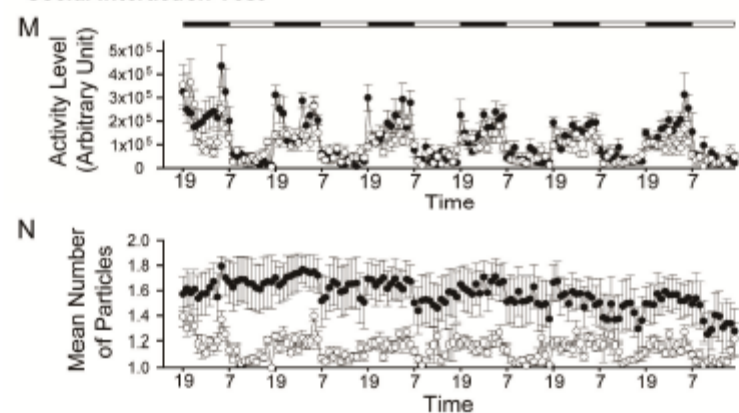

Supplement: MOESM7 [file 25657704]
